# Supplementary material for: Pharmacological Characterization of Purified Full-Length Dopamine Transporter from Drosophila melanogaster
Source: Cells. 2022 Nov 28;11(23):3811. doi: 10.3390/cells11233811 (PMC9740255; doi:10.3390/cells11233811)
Supplement: Supplementary file 1 [file cells-11-03811-s001.zip › cells-2038502-supplementary.pdf]

# Pharmacological Characterization of Purified Full-Length Dopamine Transporter from *Drosophila melanogaster*

## Supplementary Figures:

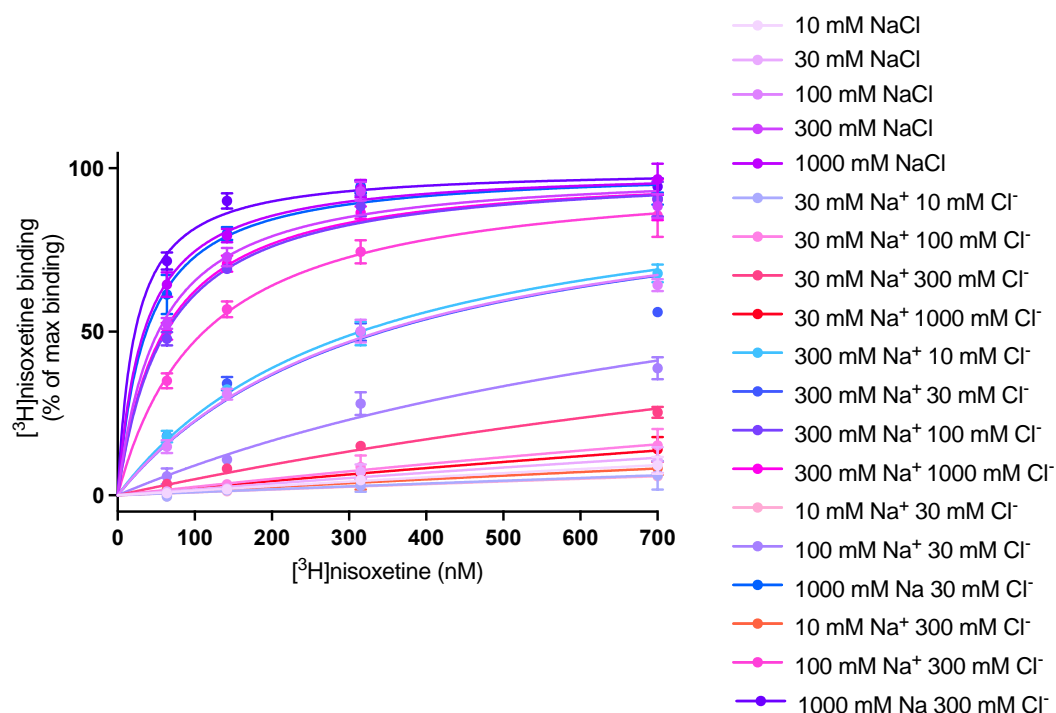

**Supplementary Figure S1.** Saturation binding of [<sup>3</sup>H]nisoxetine to purified dDAT-Hiss under varied Na<sup>+</sup> and Cl<sup>-</sup> concentrations. Assays were run with Cu<sup>2+</sup> YSi SPA beads and non-linearly fitted with a one-site binding equation. Non-specific binding was determined by addition of 20 μM nortriptyline. Graphs are shown as relative binding, calculated with B<sub>max</sub> values that were shared for each plate of 3 conditions, allowing the estimation of low affinity constants under low [Na<sup>+</sup>] conditions as long as at least one condition in each plate showed high affinity binding. Data are plotted as mean ± SD and data points are representative of triplicates from a singular dDAT purification.

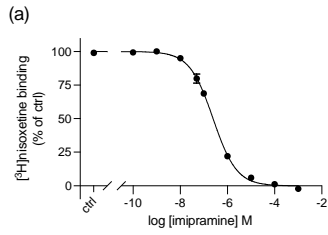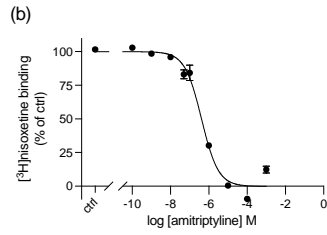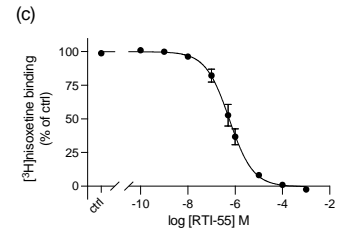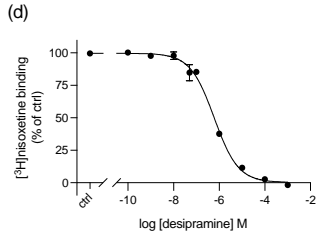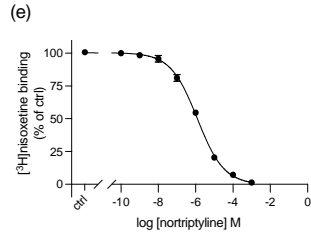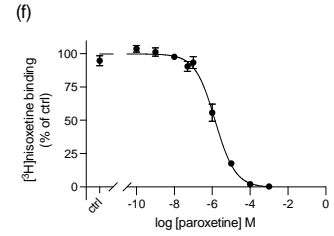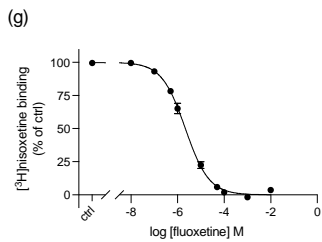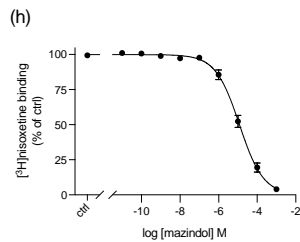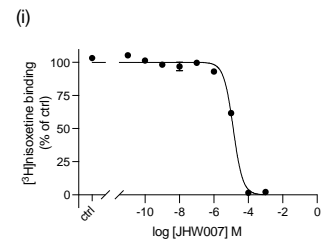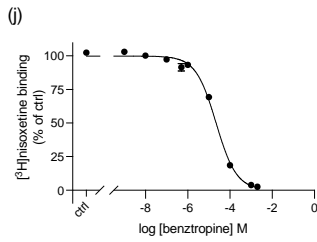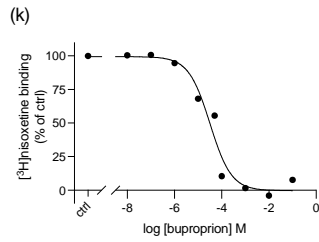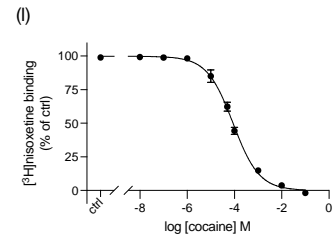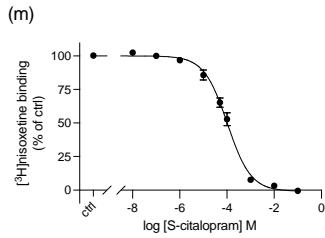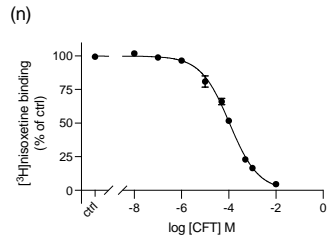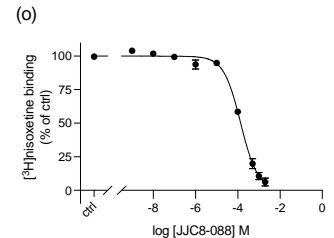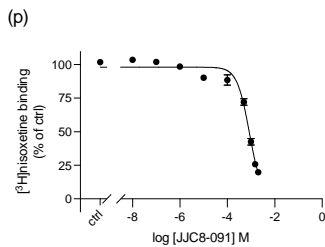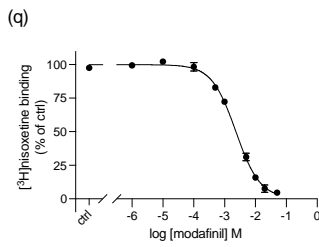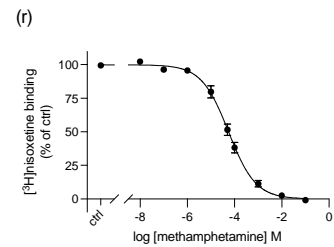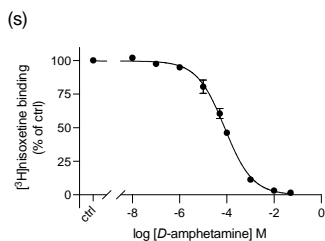

**Supplementary Figure S2.** Pharmacological characterization of purified dDAT. Competitive inhibition curves of [<sup>3</sup>H]nisoxetine binding to purified dDAT performed using Cu<sup>2+</sup> YSi SPA beads. Competition binding outcompeting 100 nM [<sup>3</sup>H]nisoxetine binding with (a) imipramine, (b) amitriptyline, (c) RTI-55, (d) desipramine, (e) nortriptyline, (f) paroxetine, (g) fluoxetine, (h) mazindol, (i) JHW007, (j) benztropine, (k) bupropion, (l) cocaine, (m) S-citalopram, (n) CFT, (o) JJC8-088, (p) JJC8-091, (q) modafinil, (r) methamphetamine, (s) *D*-amphetamine. Data are shown as mean ± SEM. All data are representative of n = 3 from 2 independent dDAT-His<sub>8</sub> purifications, performed in triplicates. ctrl (control): [<sup>3</sup>H]nisoxetine binding in the absence of the competitive ligand.
